# Supplementary material for: Single-cell RNA-seq of maize meiocytes and pollen grains
Source: Springer Nature journal article supplement (doi:10.1038/s41596-023-00889-6), 2023-10-02
Supplement: MOESM1 [file 41596_2023_889_MOESM1_ESM14.pdf]

Protocol

 Check for updates

# Single-cell RNA-seq of maize meiocytes and pollen grains

In the format provided by the authors and unedited

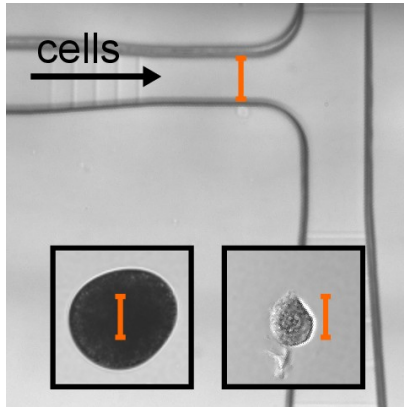

**Supplementary Fig. 1 | Maize pollen and meiocytes are too large to fit in the 10X Chromium Chip.** A close-up of the 10X flow cell showing a channel junction where cells enter from the left. Insets, pollen and a meiotic cell at the same size scale as the 10X chip. The orange bars indicate the width of the 10X channel, approximately ~50  $\mu\text{m}$ .

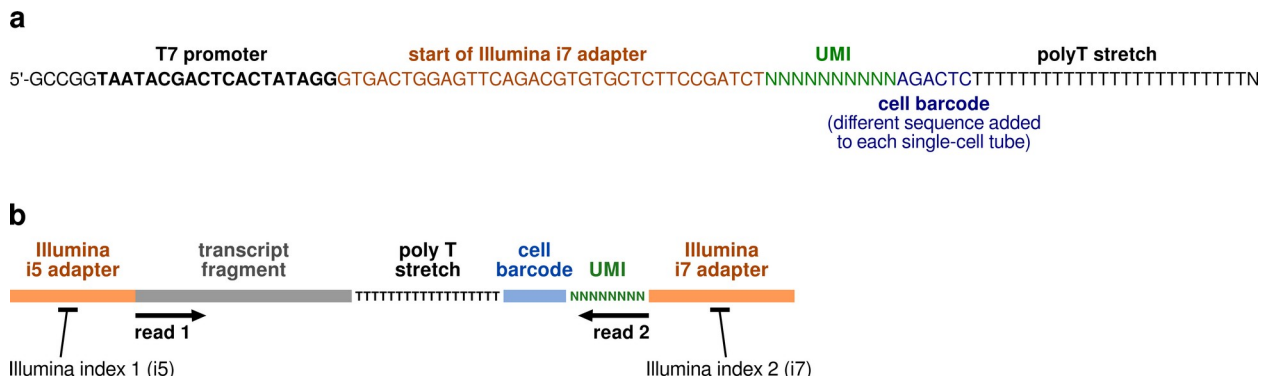

**Supplementary Fig. 2 | Schematic of CEL-Seq primers and final sequencing libraries. a,** Annotated sequence of an example primer used for reverse transcription. The full sequence of all CEL-seq primers can be found in Supplementary Table 1. These primers are identical except that the cell barcode section changes with each primer to allow multiplexing. **b,** Cartoon of final CEL-seq libraries, showing the information contained in read 1 and read 2. UMI, unique molecular identifier.

| <b>Anther size</b> | <b>Stage</b>                                 |
|--------------------|----------------------------------------------|
| < 1.2 mm           | Pre-meiosis                                  |
| 1.1-1.6 mm         | Meiotic prophase I, leptotene                |
| 1.3-1.9 mm         | Meiotic prophase I, zygotene                 |
| 1.7-2.2 mm         | Meiotic prophase I, pachytene                |
| 1.8-2.3 mm         | Meiotic prophase I, diplotene and diakinesis |
| 2.0-2.5 mm         | Meiotic I division, dyad, tetrad             |
| 2.3-5 mm           | Unicellular microspore                       |
| 4.0 mm-5.5 mm      | Bicellular microspore                        |
| >4.8 mm            | Tricellular Pollen                           |

**Supplementary Table 2 | Relationship between maize anther size and developmental stage for the W23 maize inbred.**
