# Supplementary material for: Single-cell RNA-seq of maize meiocytes and pollen grains
Source: Springer Nature journal article supplement (doi:10.1038/s41596-023-00889-6), 2023-10-02
Supplement: MOESM2 [file 41596_2023_889_MOESM2_ESM15.xlsx]

## Sheet: Sheet1
Well Position	Name	Sequence
A1	1s	GCCGGTAATACGACTCACTATAGGGTGACTGGAGTTCAGACGTGTGCTCTTCCGATCTNNNNNNNNNNAGACTCTTTTTTTTTTTTTTTTTTTTTTTTN
B1	2s	GCCGGTAATACGACTCACTATAGGGTGACTGGAGTTCAGACGTGTGCTCTTCCGATCTNNNNNNNNNNAGCTAGTTTTTTTTTTTTTTTTTTTTTTTTN
C1	3s	GCCGGTAATACGACTCACTATAGGGTGACTGGAGTTCAGACGTGTGCTCTTCCGATCTNNNNNNNNNNAGCTCATTTTTTTTTTTTTTTTTTTTTTTTN
D1	4s	GCCGGTAATACGACTCACTATAGGGTGACTGGAGTTCAGACGTGTGCTCTTCCGATCTNNNNNNNNNNAGCTTCTTTTTTTTTTTTTTTTTTTTTTTTN
E1	5s	GCCGGTAATACGACTCACTATAGGGTGACTGGAGTTCAGACGTGTGCTCTTCCGATCTNNNNNNNNNNCATGAGTTTTTTTTTTTTTTTTTTTTTTTTN
F1	6s	GCCGGTAATACGACTCACTATAGGGTGACTGGAGTTCAGACGTGTGCTCTTCCGATCTNNNNNNNNNNCATGCATTTTTTTTTTTTTTTTTTTTTTTTN
G1	7s	GCCGGTAATACGACTCACTATAGGGTGACTGGAGTTCAGACGTGTGCTCTTCCGATCTNNNNNNNNNNCATGTCTTTTTTTTTTTTTTTTTTTTTTTTN
H1	8s	GCCGGTAATACGACTCACTATAGGGTGACTGGAGTTCAGACGTGTGCTCTTCCGATCTNNNNNNNNNNCACTAGTTTTTTTTTTTTTTTTTTTTTTTTN
A2	9s	GCCGGTAATACGACTCACTATAGGGTGACTGGAGTTCAGACGTGTGCTCTTCCGATCTNNNNNNNNNNCAGATCTTTTTTTTTTTTTTTTTTTTTTTTN
B2	10s	GCCGGTAATACGACTCACTATAGGGTGACTGGAGTTCAGACGTGTGCTCTTCCGATCTNNNNNNNNNNTCACAGTTTTTTTTTTTTTTTTTTTTTTTTN
C2	11s	GCCGGTAATACGACTCACTATAGGGTGACTGGAGTTCAGACGTGTGCTCTTCCGATCTNNNNNNNNNNAGGATCTTTTTTTTTTTTTTTTTTTTTTTTN
D2	12s	GCCGGTAATACGACTCACTATAGGGTGACTGGAGTTCAGACGTGTGCTCTTCCGATCTNNNNNNNNNNAGTGCATTTTTTTTTTTTTTTTTTTTTTTTN
E2	13s	GCCGGTAATACGACTCACTATAGGGTGACTGGAGTTCAGACGTGTGCTCTTCCGATCTNNNNNNNNNNAGTGTCTTTTTTTTTTTTTTTTTTTTTTTTN
F2	14s	GCCGGTAATACGACTCACTATAGGGTGACTGGAGTTCAGACGTGTGCTCTTCCGATCTNNNNNNNNNNTCCTAGTTTTTTTTTTTTTTTTTTTTTTTTN
G2	15s	GCCGGTAATACGACTCACTATAGGGTGACTGGAGTTCAGACGTGTGCTCTTCCGATCTNNNNNNNNNNTCTGAGTTTTTTTTTTTTTTTTTTTTTTTTN
H2	16s	GCCGGTAATACGACTCACTATAGGGTGACTGGAGTTCAGACGTGTGCTCTTCCGATCTNNNNNNNNNNTCTGCATTTTTTTTTTTTTTTTTTTTTTTTN
A3	17s	GCCGGTAATACGACTCACTATAGGGTGACTGGAGTTCAGACGTGTGCTCTTCCGATCTNNNNNNNNNNTCGAAGTTTTTTTTTTTTTTTTTTTTTTTTN
B3	18s	GCCGGTAATACGACTCACTATAGGGTGACTGGAGTTCAGACGTGTGCTCTTCCGATCTNNNNNNNNNNTCGACATTTTTTTTTTTTTTTTTTTTTTTTN
C3	19s	GCCGGTAATACGACTCACTATAGGGTGACTGGAGTTCAGACGTGTGCTCTTCCGATCTNNNNNNNNNNTCGATCTTTTTTTTTTTTTTTTTTTTTTTTN
D3	20s	GCCGGTAATACGACTCACTATAGGGTGACTGGAGTTCAGACGTGTGCTCTTCCGATCTNNNNNNNNNNGTACAGTTTTTTTTTTTTTTTTTTTTTTTTN
E3	21s	GCCGGTAATACGACTCACTATAGGGTGACTGGAGTTCAGACGTGTGCTCTTCCGATCTNNNNNNNNNNGTACCATTTTTTTTTTTTTTTTTTTTTTTTN
F3	22s	GCCGGTAATACGACTCACTATAGGGTGACTGGAGTTCAGACGTGTGCTCTTCCGATCTNNNNNNNNNNGTACTCTTTTTTTTTTTTTTTTTTTTTTTTN
G3	23s	GCCGGTAATACGACTCACTATAGGGTGACTGGAGTTCAGACGTGTGCTCTTCCGATCTNNNNNNNNNNGTCTAGTTTTTTTTTTTTTTTTTTTTTTTTN
H3	24s	GCCGGTAATACGACTCACTATAGGGTGACTGGAGTTCAGACGTGTGCTCTTCCGATCTNNNNNNNNNNGTCTCATTTTTTTTTTTTTTTTTTTTTTTTN
A4	25s	GCCGGTAATACGACTCACTATAGGGTGACTGGAGTTCAGACGTGTGCTCTTCCGATCTNNNNNNNNNNGTTGCATTTTTTTTTTTTTTTTTTTTTTTTN
B4	26s	GCCGGTAATACGACTCACTATAGGGTGACTGGAGTTCAGACGTGTGCTCTTCCGATCTNNNNNNNNNNGTGACATTTTTTTTTTTTTTTTTTTTTTTTN
C4	27s	GCCGGTAATACGACTCACTATAGGGTGACTGGAGTTCAGACGTGTGCTCTTCCGATCTNNNNNNNNNNGTGATCTTTTTTTTTTTTTTTTTTTTTTTTN
D4	28s	GCCGGTAATACGACTCACTATAGGGTGACTGGAGTTCAGACGTGTGCTCTTCCGATCTNNNNNNNNNNACAGTGTTTTTTTTTTTTTTTTTTTTTTTTN
E4	29s	GCCGGTAATACGACTCACTATAGGGTGACTGGAGTTCAGACGTGTGCTCTTCCGATCTNNNNNNNNNNACCATGTTTTTTTTTTTTTTTTTTTTTTTTN
F4	30s	GCCGGTAATACGACTCACTATAGGGTGACTGGAGTTCAGACGTGTGCTCTTCCGATCTNNNNNNNNNNACTCTGTTTTTTTTTTTTTTTTTTTTTTTTN
G4	31s	GCCGGTAATACGACTCACTATAGGGTGACTGGAGTTCAGACGTGTGCTCTTCCGATCTNNNNNNNNNNACTCGATTTTTTTTTTTTTTTTTTTTTTTTN
H4	32s	GCCGGTAATACGACTCACTATAGGGTGACTGGAGTTCAGACGTGTGCTCTTCCGATCTNNNNNNNNNNACGTACTTTTTTTTTTTTTTTTTTTTTTTTN
A5	33s	GCCGGTAATACGACTCACTATAGGGTGACTGGAGTTCAGACGTGTGCTCTTCCGATCTNNNNNNNNNNACGTTGTTTTTTTTTTTTTTTTTTTTTTTTN
B5	34s	GCCGGTAATACGACTCACTATAGGGTGACTGGAGTTCAGACGTGTGCTCTTCCGATCTNNNNNNNNNNACGTGATTTTTTTTTTTTTTTTTTTTTTTTN
C5	35s	GCCGGTAATACGACTCACTATAGGGTGACTGGAGTTCAGACGTGTGCTCTTCCGATCTNNNNNNNNNNCTAGACTTTTTTTTTTTTTTTTTTTTTTTTN
D5	36s	GCCGGTAATACGACTCACTATAGGGTGACTGGAGTTCAGACGTGTGCTCTTCCGATCTNNNNNNNNNNCTAGTGTTTTTTTTTTTTTTTTTTTTTTTTN
E5	37s	GCCGGTAATACGACTCACTATAGGGTGACTGGAGTTCAGACGTGTGCTCTTCCGATCTNNNNNNNNNNCTAGGATTTTTTTTTTTTTTTTTTTTTTTTN
F5	38s	GCCGGTAATACGACTCACTATAGGGTGACTGGAGTTCAGACGTGTGCTCTTCCGATCTNNNNNNNNNNCTCATGTTTTTTTTTTTTTTTTTTTTTTTTN
G5	39s	GCCGGTAATACGACTCACTATAGGGTGACTGGAGTTCAGACGTGTGCTCTTCCGATCTNNNNNNNNNNCTCAGATTTTTTTTTTTTTTTTTTTTTTTTN
H5	40s	GCCGGTAATACGACTCACTATAGGGTGACTGGAGTTCAGACGTGTGCTCTTCCGATCTNNNNNNNNNNCTTCGATTTTTTTTTTTTTTTTTTTTTTTTN
A6	41s	GCCGGTAATACGACTCACTATAGGGTGACTGGAGTTCAGACGTGTGCTCTTCCGATCTNNNNNNNNNNCTGTACTTTTTTTTTTTTTTTTTTTTTTTTN
B6	42s	GCCGGTAATACGACTCACTATAGGGTGACTGGAGTTCAGACGTGTGCTCTTCCGATCTNNNNNNNNNNCTGTGATTTTTTTTTTTTTTTTTTTTTTTTN
C6	43s	GCCGGTAATACGACTCACTATAGGGTGACTGGAGTTCAGACGTGTGCTCTTCCGATCTNNNNNNNNNNTGAGACTTTTTTTTTTTTTTTTTTTTTTTTN
D6	44s	GCCGGTAATACGACTCACTATAGGGTGACTGGAGTTCAGACGTGTGCTCTTCCGATCTNNNNNNNNNNTGCAACTTTTTTTTTTTTTTTTTTTTTTTTN
E6	45s	GCCGGTAATACGACTCACTATAGGGTGACTGGAGTTCAGACGTGTGCTCTTCCGATCTNNNNNNNNNNTGCATGTTTTTTTTTTTTTTTTTTTTTTTTN
F6	46s	GCCGGTAATACGACTCACTATAGGGTGACTGGAGTTCAGACGTGTGCTCTTCCGATCTNNNNNNNNNNTGCAGATTTTTTTTTTTTTTTTTTTTTTTTN
G6	47s	GCCGGTAATACGACTCACTATAGGGTGACTGGAGTTCAGACGTGTGCTCTTCCGATCTNNNNNNNNNNTGTCACTTTTTTTTTTTTTTTTTTTTTTTTN
H6	48s	GCCGGTAATACGACTCACTATAGGGTGACTGGAGTTCAGACGTGTGCTCTTCCGATCTNNNNNNNNNNTGTCGATTTTTTTTTTTTTTTTTTTTTTTTN
